# Supplementary material for: Dynamic manipulation of the local pH within a nanopore triggered by surface-induced phase transition
Source: Royal Society of Chemistry journal article supplement (doi:10.1039/c7cp01157a), 2017-01-01
Supplement: c7cp01157a1.pdf [file c7cp01157a1.pdf]

## Supporting Information

### **Dynamic Manipulation of Local pH within Nanopore Triggered by Surface-Induced Phase Transition**

Akira Koyama,<sup>a</sup> Kazuhiro Fukami,<sup>\*,a</sup> Yujin Imaoka,<sup>a</sup> Atsushi Kitada,<sup>a</sup> Tetsuo Sakka,<sup>b</sup> Takeshi Abe,<sup>b</sup> Kuniaki Murase<sup>a</sup> and Masahiro Kinoshita<sup>\*,c</sup>

<sup>a</sup>Department of Materials Science and Engineering, Kyoto University, Kyoto 606-8501, Japan

<sup>b</sup>Department of Energy and Hydrocarbon Chemistry, Kyoto University, Kyoto 615-8510, Japan

<sup>c</sup>Institute of Advanced Energy, Kyoto University, Kyoto 611-0011, Japan

Corresponding author:

Kazuhiro Fukami, Prof. Dr.

Department of Materials Science and Engineering, Kyoto University, Yoshida-Hommachi 36-1, Sakyo-ku, Kyoto 606-8501, Japan.

Email: fukami.kazuhiro.2u@kyoto-u.ac.jp

Masahiro Kinoshita, Prof. Dr.

Institute of Advanced Energy, Kyoto University, Gokasho, Uji, Kyoto 611-0011, Japan.

Email: kinoshit@iae.kyoto-u.ac.jp

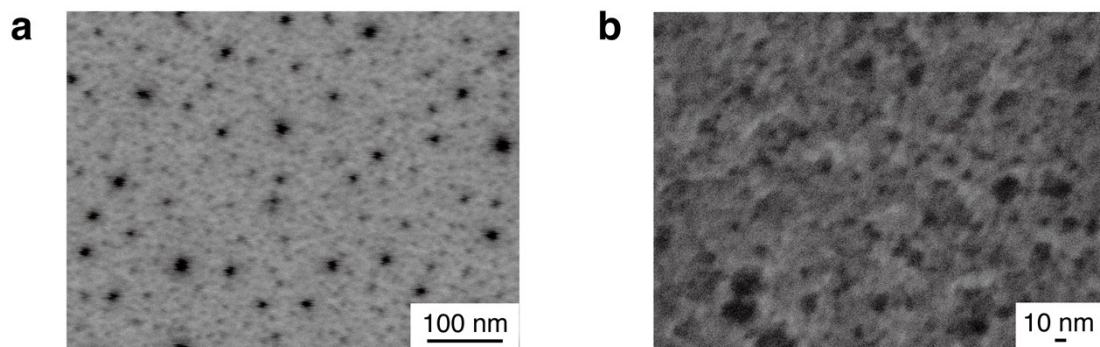

**Figure S1.** Surface images of porous silicon with the pore sizes of (a)  $\sim 10$  nm and (b)  $\sim 2$  nm.

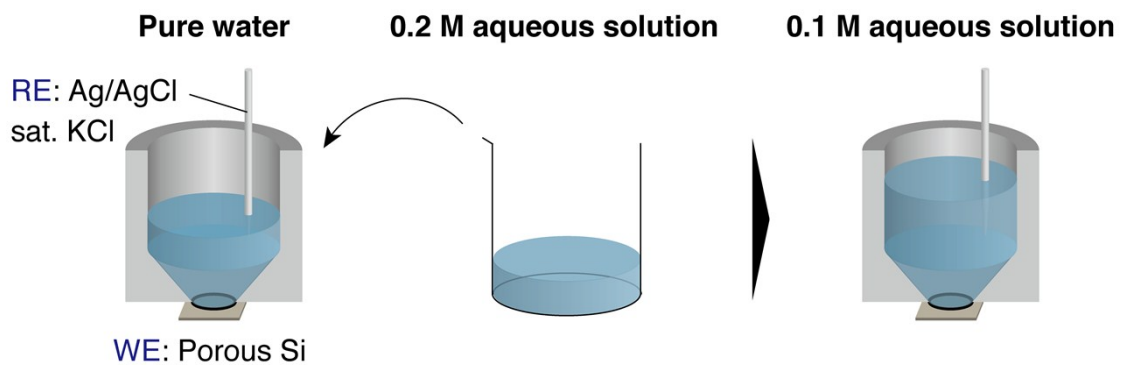

**Figure S2:** Illustration of experimental procedure for the measurement of temporal potential profile. The potential measurement for porous silicon started before adding the 0.2 M aqueous solution into the pure water in the cell. The time of 0 s in the figures of temporal potential profiles for porous silicon indicates the moment of the addition of 0.2 M aqueous solution.

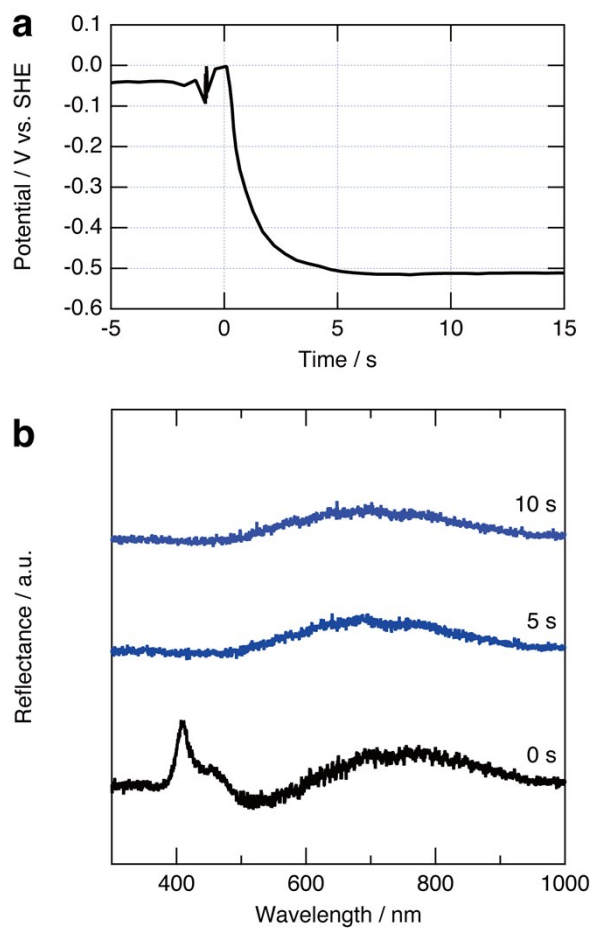

**Figure S3.** (a) Temporal profiles of the potentials of porous-silicon rugate filter with the pore size of  $\sim 2$  nm (2-nm PSiRF) in the aqueous solution of 0.1 M TBACl. (b) Reflectance spectra of 2-nm PSiRF in the aqueous solution of 0.1 M TBACl at various times after adding the 0.2 M aqueous solutions into the cell.

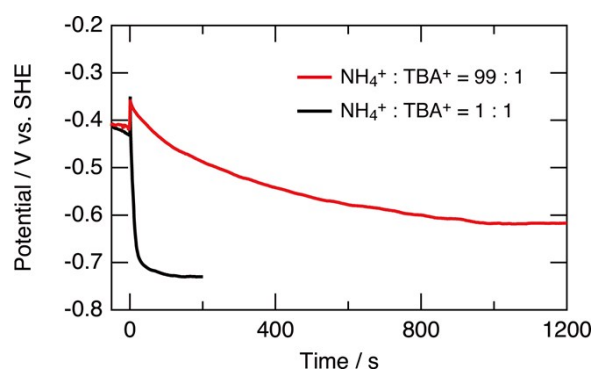

**Figure S4.** Temporal profiles of the potential measured using the 10-nm porous silicon in aqueous solution containing  $\text{NH}_4\text{Cl}$  mixed with TEACl or TBACl at the mixing ratios of 99:1 and 1:1 while fixing the total ion concentration at 0.1 M.
